# Supplementary material for: The Structured Coalescent and Its Approximations
Source: PubMed Central journal article supplement — Mol Biol Evol. 2017 Jun 28;34(11):2970–81. doi: 10.1093/molbev/msx186 (PMC5850743; doi:10.1093/molbev/msx186), 2017-06-28
Supplement: msx186_supp.pdf [file msx186_supp.pdf]

# The Structured Coalescent and its Approximations: Supplementary Material

Nicola F. Müller<sup>\*†1</sup>, David A. Rasmussen<sup>\*†</sup> and Tanja Stadler<sup>\*†1</sup>

<sup>\*</sup>ETH Zurich, Department of Biosystems Science and Engineering, 4058 Basel, Switzerland

<sup>†</sup>Swiss Institute of Bioinformatics (SIB), Switzerland

<sup>1</sup>Corresponding authors

## Derivation of the differential equations for MASCO

We here derive the change in marginal lineage state probability over time,  $P_t(L_i = l_i, T)$ , from the ESCO interval contribution differential equations governing the change in the probability of a configuration  $\mathcal{K}$  and the coalescent history  $T$ . We denote with  $\mathcal{K} \setminus i$  a configuration for lineages  $1, 2, \dots, i-1, i+1, \dots, n$ .  $P_t(L_i = l_i, T)$  denotes the probability of lineage  $i$  being in state  $l_i$  at time  $t$  joint with the probability of the coalescent history  $T$  up to time  $t$ . We can express  $P_t(L_i = l_i, T)$  and its derivative as:

$$\begin{aligned} P(L_i = l_i, T) &= \sum_{\mathcal{K} \setminus i} P_t(\mathcal{K}, T) \\ \frac{d}{dt} P_t(L_i = l_i, T) &= \frac{d}{dt} \sum_{\mathcal{K} \setminus i} P_t(\mathcal{K}, T) = \sum_{\mathcal{K} \setminus i} \frac{d}{dt} P_t(\mathcal{K}, T) \end{aligned}$$

with  $\sum_{\mathcal{K} \setminus i}$  denoting the summation over all configurations except fixing the state of lineage  $i$ . Using Eqn. 2 from the main text, we can express  $\frac{d}{dt} P(L_i = l_i, T)$  as:

$$\frac{d}{dt} P_t(L_i = l_i, T) = \sum_{\mathcal{K} \setminus i} \sum_{j=1}^n \sum_{a=1}^m \left( \mu_{al_j} P_t(\mathcal{K}_{ja}, T) - \mu_{l_j a} P_t(\mathcal{K}_{jl_j}, T) \right) - \sum_{\mathcal{K} \setminus i} \left( \sum_{a=1}^m \lambda_a \binom{k_a(\mathcal{K})}{2} P_t(\mathcal{K}, T) \right)$$

with  $\mathcal{K}_{ja}$  being the configuration  $\mathcal{K} \setminus j$  and lineage  $j$  being in  $a$ . We can now split the cases where  $j \neq i$  and where  $j = i$  to obtain:

$$\begin{aligned} \frac{d}{dt} P_t(L_i = l_i, T) &= \sum_{\mathcal{K} \setminus i} \sum_{\substack{j=1 \\ j \neq i}}^n \sum_{a=1}^m \left( \mu_{al_j} P_t(\mathcal{K}_{ja}, T) - \mu_{l_j a} P_t(\mathcal{K}_{jl_j}, T) \right) \\ &\quad + \sum_{\mathcal{K} \setminus i} \sum_{a=1}^m \left( \mu_{al_i} P_t(\mathcal{K}_{ia}, T) - \mu_{l_i a} P_t(\mathcal{K}_{il_i}, T) \right) \\ &\quad - \sum_{\mathcal{K} \setminus i} \left( \sum_{a=1}^m \lambda_a \binom{k_a(\mathcal{K})}{2} P_t(\mathcal{K}, T) \right) \end{aligned}$$

We note that  $\sum_{\mathcal{K} \setminus i} \sum_{j \neq i}^n \sum_{a=1}^m \mu_{al_j} P_t(\mathcal{K}_{ja}, T)$  is the rate to leave via migration any configuration on lineages  $1, 2, \dots, i-1, i+1, \dots, n$ . Further,  $\sum_{\mathcal{K} \setminus i} \sum_{j \neq i}^n \sum_{a=1}^m \mu_{l_j a} P_t(\mathcal{K}_{jl_j}, T)$  is the rate to enter via migration any configuration on lineages  $1, 2, \dots, i-1, i+1, \dots, n$ . Since the net change of probability mass due to migration for lineages other than  $i$  has to always be 0, we can write:

$$\frac{d}{dt} P_t(L_i = l_i, T) = \sum_{\mathcal{K} \setminus i} \sum_{a=1}^m \left( \mu_{al_i} P_t(\mathcal{K}_{ia}, T) - \mu_{l_i a} P_t(\mathcal{K}_{il_i}, T) \right) - \sum_{\mathcal{K} \setminus i} \left( \sum_{a=1}^m \lambda_a \binom{k_a(\mathcal{K})}{2} P_t(\mathcal{K}, T) \right)$$

Using the fact that  $\sum_{\mathcal{K} \setminus i} P_t(\mathcal{K}_{ia}, T) = P_t(L_i = a, T)$ , we get:

$$\frac{d}{dt} P_t(L_i = l_i, T) = \sum_{a=1}^m \left( \mu_{al_i} P_t(L_i = a, T) - \mu_{l_i a} P_t(L_i = l_i, T) \right) - \sum_{\mathcal{K} \setminus i} \left( \sum_{a=1}^m \lambda_a \binom{k_a(\mathcal{K})}{2} P_t(\mathcal{K}, T) \right) \quad (1)$$

The first term denotes the reallocation of probability mass due to migration. The second term describes the loss of probability mass due to the coalescent process, with the rate at which coalescent events occur.

Following the main text,  $k_a(\mathcal{K})$  denotes the number of lineages in state  $a$  for configuration  $\mathcal{K}$ . We next express  $\binom{k_a(\mathcal{K})}{2}$  by using the probabilities of lineages  $j$  and  $k$  being in state  $a$  conditional on the configuration  $\mathcal{K}$ : we have  $k_a(\mathcal{K}) = \sum_{j=1}^n P_t(L_j = a|\mathcal{K}, T)$ , with  $P_t(L_j = a|\mathcal{K}, T) = 1$  if  $L_j = a$  in configuration  $\mathcal{K}$ , and 0 otherwise. We can write the term  $\binom{k_a(\mathcal{K})}{2}$ , i.e. the number of pairs of lineages that are both in state  $a$ , as sums over these conditional probabilities. Imagine a matrix with  $n$  rows and  $n$  columns, with entries  $P_t(L_j = a, L_k = a|\mathcal{K}, T)$  at position  $(j, k)$ . If we want to get the number of pairs of lineages  $(j, k)$  that are both in state  $a$  (i.e.  $\binom{k_a(\mathcal{K})}{2}$ ), we can count every element in the upper triangle for which both lineages are in state  $a$  (i.e.  $\sum_{j=1}^n \sum_{k=j+1}^n P_t(L_j = a, L_k = a|\mathcal{K}, T)$ ). We can now write this double summation as  $\frac{1}{2} \sum_{j=1}^n \sum_{k \neq j}^n$ , since the matrix is symmetric. This leads to:

$$\sum_{\mathcal{K} \setminus i} \left( \sum_{a=1}^m \lambda_a \binom{k_a(\mathcal{K})}{2} P_t(\mathcal{K}, T) \right) = \sum_{\mathcal{K} \setminus i} \sum_{a=1}^m \frac{\lambda_a}{2} \sum_{j=1}^n \sum_{\substack{k=1 \\ k \neq j}}^n P_t(L_j = a, L_k = a|\mathcal{K}, T) P_t(\mathcal{K}, T) \quad (2)$$

We now write the above term explicitly for cases involving lineage  $i$  and cases not involving lineage  $i$  and write:

$$\begin{aligned} \sum_{\mathcal{K} \setminus i} \left( \sum_{a=1}^m \lambda_a \binom{k_a(\mathcal{K})}{2} P_t(\mathcal{K}, T) \right) &= \sum_{a=1}^m \frac{\lambda_a}{2} \sum_{\substack{j=1 \\ j \neq i}}^n \sum_{\substack{k=1 \\ k \neq j, i}}^n \sum_{\mathcal{K} \setminus i} P_t(L_j = a, L_k = a|\mathcal{K}, T) P_t(\mathcal{K}, T) \\ &\quad + \sum_{a=1}^m \frac{\lambda_a}{2} \sum_{\substack{k=1 \\ k \neq i}}^n \sum_{\mathcal{K} \setminus i} P_t(L_i = a, L_k = a|\mathcal{K}, T) P_t(\mathcal{K}, T) \\ &\quad + \sum_{a=1}^m \frac{\lambda_a}{2} \sum_{\substack{j=1 \\ j \neq i}}^n \sum_{\mathcal{K} \setminus i} P_t(L_j = a, L_i = a|\mathcal{K}, T) P_t(\mathcal{K}, T) \\ &= \sum_{a=1}^m \frac{\lambda_a}{2} \sum_{\substack{j=1 \\ j \neq i}}^n \sum_{\substack{k=1 \\ k \neq j, i}}^n \sum_{\mathcal{K} \setminus i} P_t(L_j = a, L_k = a|\mathcal{K}, T) P_t(\mathcal{K}, T) \\ &\quad + \sum_{a=1}^m \lambda_a \sum_{\substack{k=1 \\ k \neq i}}^n \sum_{\mathcal{K} \setminus i} P_t(L_i = a, L_k = a|\mathcal{K}, T) P_t(\mathcal{K}, T) \end{aligned} \quad (3)$$

We now derive an expression for  $\sum_{\mathcal{K} \setminus i} P_t(L_j = a, L_k = a|\mathcal{K}, T) P_t(\mathcal{K}, T)$ :

$$\begin{aligned} \sum_{\mathcal{K} \setminus i} P_t(L_j = a, L_k = a|\mathcal{K}, T) P_t(\mathcal{K}, T) &= \sum_{\mathcal{K} \setminus i} P_t(L_j = a, L_k = a, \mathcal{K}, T) \\ &= P_t(L_j = a, L_k = a, L_i = l_i, T) \\ &= P_t(L_j = a, L_k = a, L_i = l_i|T) P_t(T) \end{aligned} \quad (4)$$

Next, we can assume that the state of lineages  $j, k$  and  $i$ , with  $j \neq k \neq i$ , are mutually independent, i.e. we assume that:

$$P_t(L_j = l_j, L_k = l_k, L_i = l_i|T) \stackrel{MASCO}{=} P_t(L_i = l_i|T) P_t(L_j = l_j|T) P_t(L_k = l_k|T)$$

This allows us to simplify equation 4, for  $j, k \neq i$ , to:

$$P_t(L_j = a, L_k = a, L_i = l_i|T) P_t(T) = P_t(L_j = a|T) P_t(L_k = a|T) P_t(L_i = l_i, T) \quad (5)$$

We can now plug equation 5 into equation 3 to receive:

$$\begin{aligned}
\sum_{\mathcal{K} \setminus i} \left( \sum_{a=1}^m \lambda_a \binom{k_a(\mathcal{K})}{2} P_t(\mathcal{K}, T) \right) &= P_t(L_i = l_i, T) \sum_{a=1}^m \frac{\lambda_a}{2} \sum_{\substack{j=1 \\ j \neq i}}^n \sum_{\substack{k=1 \\ k \neq j, i}}^n P_t(L_j = a|T) P_t(L_k = a|T) \\
&+ \sum_{a=1}^m \lambda_a \sum_{\substack{k=1 \\ k \neq i}}^n P_t(L_i = a, L_k = a, L_i = l_i|T) P_t(T) \\
&= P_t(L_i = l_i, T) \sum_{a=1}^m \frac{\lambda_a}{2} \sum_{\substack{j=1 \\ j \neq i}}^n \sum_{\substack{k=1 \\ k \neq j, i}}^n P_t(L_j = a|T) P_t(L_k = a|T) \\
&+ \lambda_{l_i} \sum_{\substack{k=1 \\ k \neq i}}^n P_t(L_i = l_i, L_k = a|T) P_t(T) \\
&= P_t(L_i = l_i, T) \sum_{a=1}^m \frac{\lambda_a}{2} \sum_{\substack{j=1 \\ j \neq i}}^n \sum_{\substack{k=1 \\ k \neq j, i}}^n P_t(L_j = a|T) P_t(L_k = a|T) \\
&+ P_t(L_i = l_i, T) \lambda_{l_i} \sum_{\substack{k=1 \\ k \neq i}}^n P_t(L_k = l_i|T)
\end{aligned}$$

using the MASCO approximation for the last line. Plugging the above expression for  $\sum_{\mathcal{K} \setminus i} \left( \sum_{a=1}^m \frac{\lambda_a}{2} \binom{k_a(\mathcal{K})}{2} P_t(\mathcal{K}, T) \right)$  into equation 1 yields:

$$\begin{aligned}
\frac{d}{dt} P_t(L_i = l_i, T) &= \sum_{a=1}^m \left( \mu_{al_i} P_t(L_i = a, T) - \mu_{l_i a} P_t(L_i = l_i, T) \right) \\
&- P_t(L_i = l_i, T) \sum_{a=1}^m \frac{\lambda_a}{2} \sum_{\substack{j=1 \\ j \neq i}}^n \sum_{\substack{k=1 \\ k \neq j, i}}^n P_t(L_j = a|T) P_t(L_k = a|T) \\
&- P_t(L_i = l_i, T) \lambda_{l_i} \sum_{\substack{k=1 \\ k \neq i}}^n P_t(L_k = l_i|T) \quad (6)
\end{aligned}$$

The first term now describes how the marginal probability of lineage  $i$  in state  $l_i$  changes due to migration. The second line denotes the rate at which coalescent events happen that do not directly involve lineage  $i$  and the third line denotes the rate at which coalescent events involving lineage  $i$  happen. The reason why we need to consider events that do not involve lineage  $i$  is that we seek to calculate the probability of lineages  $i$  in state  $l_i$  jointly with the full coalescent history  $T$ .

## Derivation of the differential equations for SISCO

The differential equation describing the change in probability over time using the approximation of state independence can be derived from equation 6. In addition to the MASCO assumption, we now further assume  $P_t(L_i = b|T) \stackrel{SISCO}{=} P_t(L_i = b)$ . The differential equations for  $P_t(L_i = b, T), i = 1, \dots, m$  under MASCO become differential equation for  $P_t(T)$  and  $P_t(L_i = b), i = 1, \dots, m$  when using the SISCO approximation. We will now first show how to derive  $P_t(T)$  and then how to derive  $P_t(L_i = b), i = 1, \dots, m$ . Since under SISCO,

$$\sum_{b=1}^m P_t(L_i = b, T) = P_t(T) \sum_{b=1}^m P_t(L_i = b) = P_t(T),$$

where the second equality follows from  $\sum_{b=1}^m P_t(L_i = b) = 1$ , we obtain,

$$\frac{d}{dt}P_t(T) = \frac{d}{dt} \sum_{b=1}^m P_t(L_i = b, T).$$

From the MASCO equation 6 with additionally using the SISCO approximation, we obtain,

$$\begin{aligned} \frac{d}{dt}P_t(T) &= \frac{d}{dt} \sum_{b=1}^m P_t(L_i = b, T) = \sum_{b=1}^m \sum_{a=1}^m \left( \mu_{ab}P_t(L_i = a, T) - \mu_{ba}P_t(L_i = b, T) \right) \\ &\quad - \sum_{b=1}^m P_t(L_i = b, T) \sum_{a=1}^m \frac{\lambda_a}{2} \sum_{\substack{j=1 \\ j \neq i}}^n \sum_{\substack{k=1 \\ k \neq j, i}}^n P_t(L_j = a)P_t(L_k = a) \\ &\quad - \sum_{b=1}^m P_t(L_i = b, T) \lambda_b \sum_{\substack{k=1 \\ k \neq i}}^n P_t(L_k = b) \\ &= \sum_{b=1}^m \sum_{a=1}^m \left( \mu_{ab}P_t(L_i = a, T) - \mu_{ba}P_t(L_i = b, T) \right) \\ &\quad - P_t(T) \sum_{a=1}^m \frac{\lambda_a}{2} \sum_{\substack{j=1 \\ j \neq i}}^n \sum_{\substack{k=1 \\ k \neq j, i}}^n P_t(L_j = a)P_t(L_k = a) \\ &\quad - P_t(T) \sum_{a=1}^m \lambda_a \sum_{\substack{k=1 \\ k \neq i}}^n P_t(L_i = a)P_t(L_k = a) \\ &= \sum_{b=1}^m \sum_{a=1}^m \left( \mu_{ab}P_t(L_i = a, T) - \mu_{ba}P_t(L_i = b, T) \right) \\ &\quad - P_t(T) \sum_{a=1}^m \frac{\lambda_a}{2} \sum_{\substack{j=1 \\ j \neq i}}^n \sum_{\substack{k=1 \\ k \neq j, i}}^n P_t(L_j = a)P_t(L_k = a) \\ &\quad - P_t(T) \sum_{a=1}^m \frac{\lambda_a}{2} \sum_{\substack{j=1 \\ j \neq i}}^n P_t(L_i = a)P_t(L_j = a) \\ &= \sum_{b=1}^m \sum_{a=1}^m \left( \mu_{ab}P_t(L_i = a, T) - \mu_{ba}P_t(L_i = b, T) \right) (= 0) \\ &\quad - P_t(T) \sum_{a=1}^m \frac{\lambda_a}{2} \sum_{\substack{j=1 \\ j \neq i}}^n \sum_{\substack{k=1 \\ k \neq j}}^n P_t(L_j = a)P_t(L_k = a) \tag{7} \\ &= -P_t(T) \sum_{a=1}^m \frac{\lambda_a}{2} \sum_{\substack{j=1 \\ j \neq i}}^n \sum_{\substack{k=1 \\ k \neq j}}^n P_t(L_j = a)P_t(L_k = a) \tag{8} \end{aligned}$$

We now derive how lineage move between states, i.e. an expression for the differential equation of  $P_t(L_i = b)$ . Under the SISCO approximation, we can write:

$$\frac{d}{dt} \sum_{b=1}^m P_t(L_i = b, T) = \sum_{b=1}^m P_t(L_i = b) \frac{d}{dt} P_t(T) + P_t(T) \sum_{b=1}^m \frac{d}{dt} P_t(L_i = b)$$

Since  $\sum_{b=1}^m P_t(L_i = b) = 1$ , the above expression simplifies to:

$$\frac{d}{dt} \sum_{b=1}^m P_t(L_i = b, T) = P_t(T) \sum_{b=1}^m \frac{d}{dt} P_t(L_i = b) + \frac{d}{dt} P_t(T)$$

and can be transformed to,

$$0 = \sum_{b=1}^m \frac{d}{dt} P_t(L_i = b) = \frac{1}{P_t(T)} \left( \frac{d}{dt} \sum_{b=1}^m P_t(L_i = b, T) - \frac{d}{dt} P_t(T) \right)$$

The right hand side is equal to  $\frac{1}{P_t(T)}$  (eq 7 – eq 8). Since we aim to get an expression for  $\frac{d}{dt} P_t(L_i = b)$ , we write:

$$\begin{aligned} \sum_{b=1}^m \frac{d}{dt} P_t(L_i = b) &= \frac{1}{P_t(T)} \sum_{b=1}^m \sum_{a=1}^m \left( \mu_{ab} P_t(L_i = a, T) - \mu_{ba} P_t(L_i = b, T) \right) \\ &= \sum_{b=1}^m \sum_{a=1}^m \left( \mu_{ab} P_t(L_i = a|T) - \mu_{ba} P_t(L_i = b|T) \right) \\ &= \sum_{b=1}^m \sum_{a=1}^m \left( \mu_{ab} P_t(L_i = a) - \mu_{ba} P_t(L_i = b) \right) \end{aligned}$$

Hence, we can calculate  $\frac{d}{dt} P_t(L_i = b)$  using the following equation,

$$\frac{d}{dt} P_t(L_i = b) = \sum_{a=1}^m \left( \mu_{ab} P_t(L_i = a) - \mu_{ba} P_t(L_i = b) \right). \quad (9)$$

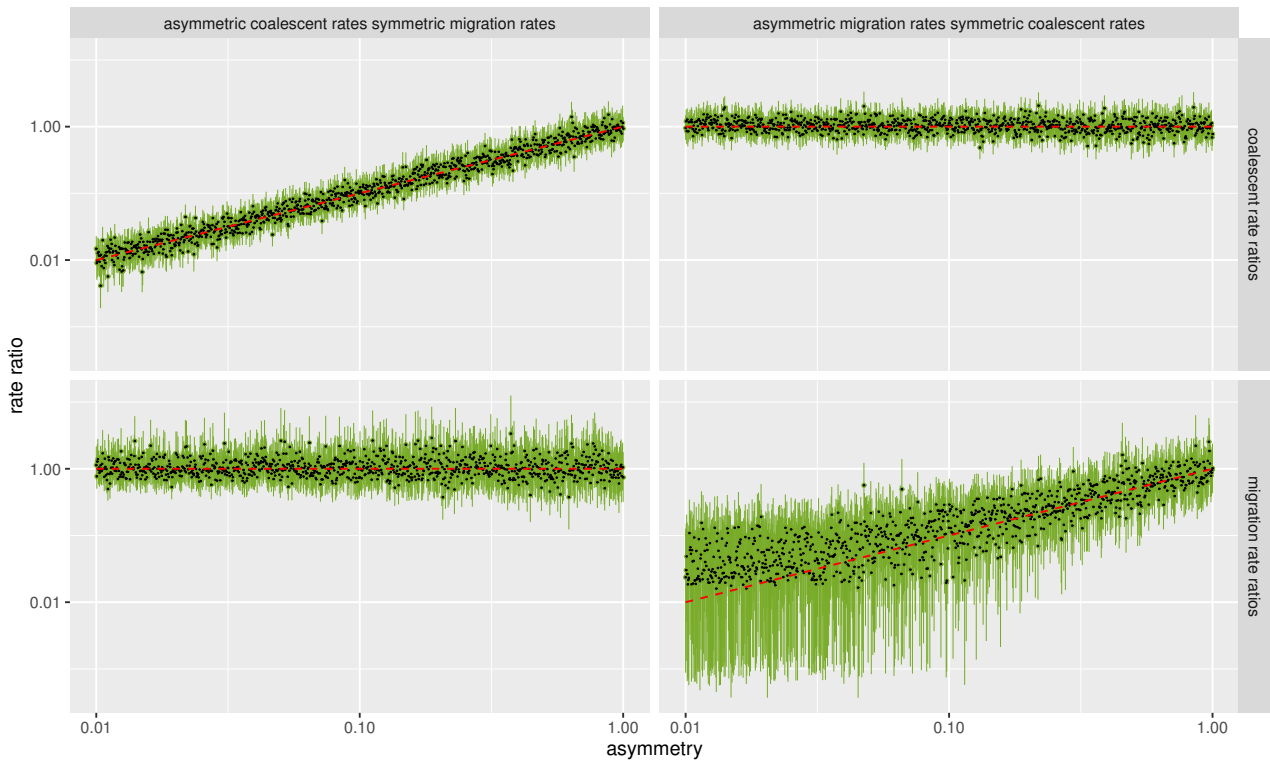

Figure S1: **Inferred asymmetry of migration and coalescent rates with confidence intervals using MASCO.** Here we show the inferred coalescent (upper row) and migration (lower row) rate ratios under different conditions. In the first column, the coalescent rate ratios (x-axis) are varied while the migration rates ratios are kept constant. In the second column, the migration rate ratios (x-axis) are varied, while the coalescent rate ratios are kept constant. The red line indicates where the estimates should lie. The black point represent the mean estimated ratios and the green lines represent the 95% confidence intervals of these estimates

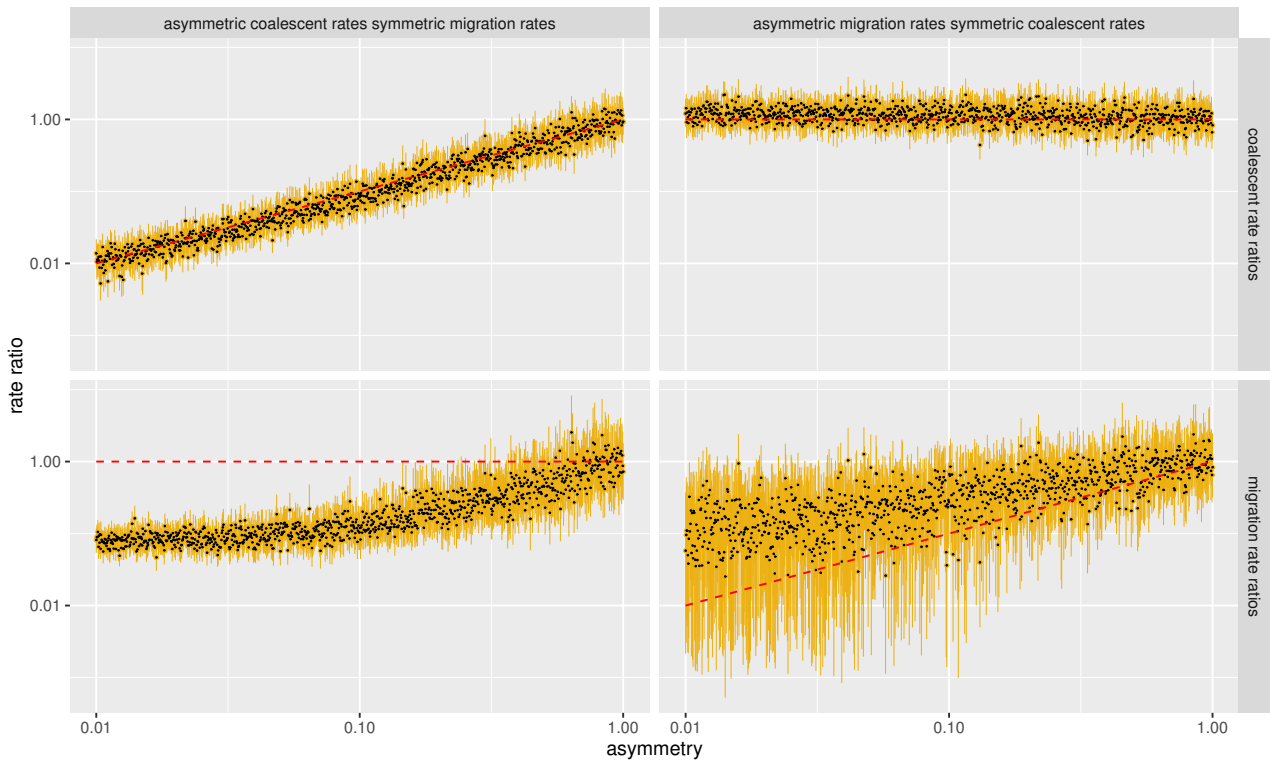

Figure S2: **Inferred asymmetry of migration and coalescent rates with confidence intervals using SISCO.** Here we show the inferred coalescent (upper row) and migration (lower row) rate ratios under different conditions. In the first column, the coalescent rate ratios (x-axis) are varied while the migration rates ratios are kept constant. In the second column, the migration rate ratios (x-axis) are varied, while the coalescent rate ratios are kept constant. The red line indicates where the estimates should lie. The black point represent the mean estimated ratios and the orange lines represent the 95% confidence intervals of these estimates

Table S1: Sample locations and associated regions for the here used AIV sequences

| location         | region         | number of samples |
|------------------|----------------|-------------------|
| Alaska           | Alaska         | 18                |
| Saskatchewan     | North West     | 1                 |
| North Dakota     | North West     | 1                 |
| British Columbia | North West     | 5                 |
| Alberta          | North West     | 4                 |
| Washington       | North West     | 3                 |
| California       | South West     | 21                |
| Mexico           | South West     | 3                 |
| Mississippi      | Center         | 7                 |
| Missouri         | Center         | 6                 |
| Nebraska         | Center         | 2                 |
| Texas            | Center         | 2                 |
| Delaware         | East Coast     | 7                 |
| Delaware Bay     | East Coast     | 14                |
| New Jersey       | East Coast     | 13                |
| Maryland         | East Coast     | 2                 |
| Pennsylvania     | East Coast     | 1                 |
| North Carolina   | East Coast     | 3                 |
| Illinois         | North Mid East | 3                 |
| Ohio             | North Mid East | 4                 |
| Wisconsin        | North Mid East | 4                 |
| New Brunswick    | North East     | 8                 |
| Nova Scotia      | North East     | 1                 |
